# Supplementary material
Source: PubMed Central journal article supplement (PMC3730925)
Supplement: 2a033fcde1a966dec6f4993b24abee6f_genetics.113.152736-6.pdf [file 2a033fcde1a966dec6f4993b24abee6f_genetics.113.152736-6.pdf]

**Table S2** The mean squared error comparing the estimated trend functions to the simulated ones. F and N represent **VBfun** and **VBnonfun** (assuming the diagonal residual covariance structure in the model), respectively (assuming the diagonal residual covariance structure in the model), and  $h^2$  is the averaged heritability over time.

|     | $k=10$<br>$u=0.5$<br>$h^2=0.2265$ |        | $k=10$<br>$u=0.8$<br>$h^2=0.0922$ |        | $k=100$<br>$u=0.5$<br>$h^2=0.2347$ |        | $k=100$<br>$u=0.8$<br>$h^2=0.1259$ |        |
|-----|-----------------------------------|--------|-----------------------------------|--------|------------------------------------|--------|------------------------------------|--------|
|     | F                                 | N      | F                                 | N      | F                                  | N      | F                                  | N      |
| 0   | 0.1765                            | 0.2481 | 0.9436                            | 0.5591 | 0.0199                             | 0.4005 | 0.1113                             | 0.6785 |
| 35  | 0.0896                            | 0.1279 | 0.1863                            | 0.1882 | 0.0188                             | 0.0811 | 0.0341                             | 0.1163 |
| 52  | 0.2814                            | 0.4121 | 0.2839                            | 0.2703 | 0.0245                             | 0.1376 | 0.0918                             | 0.2739 |
| 78  | 0.0840                            | 0.0748 | 0.1214                            | 0.0667 | 0.0256                             | 0.0693 | 0.1312                             | 0.2146 |
| 98  | 0.0997                            | 0.0710 | 0.1480                            | 0.1233 | 0.0073                             | 0.0931 | 0.0584                             | 0.2867 |
| 118 | 0.0067                            | 0.0245 | 0.1209                            | 0.1550 | 0.0071                             | 0.0719 | 0.0273                             | 0.1222 |
| 174 | 0.0327                            | 0.0341 | 0.0877                            | 0.2032 | 0.0087                             | 0.0941 | 0.0732                             | 0.1650 |
| 216 | 0.0658                            | 0.0478 | 0.2431                            | 0.1284 | 0.0157                             | 0.0608 | 0.0574                             | 0.1031 |
| 358 | 0.0221                            | 0.0432 | 0.0556                            | 0.0403 | 0.0036                             | 0.0403 | 0.0230                             | 0.0717 |
| 453 | 0.1556                            | 0.0706 | 0.2629                            | 0.0403 | 0.0225                             | 0.0864 | 0.1547                             | 0.2198 |
