# Supplementary material
Source: PubMed Central journal article supplement (PMC3730925)
Supplement: 3d06aafbe9da38c3d40763dfdf4128bc_genetics.113.152736-17.pdf [file 3d06aafbe9da38c3d40763dfdf4128bc_genetics.113.152736-17.pdf]

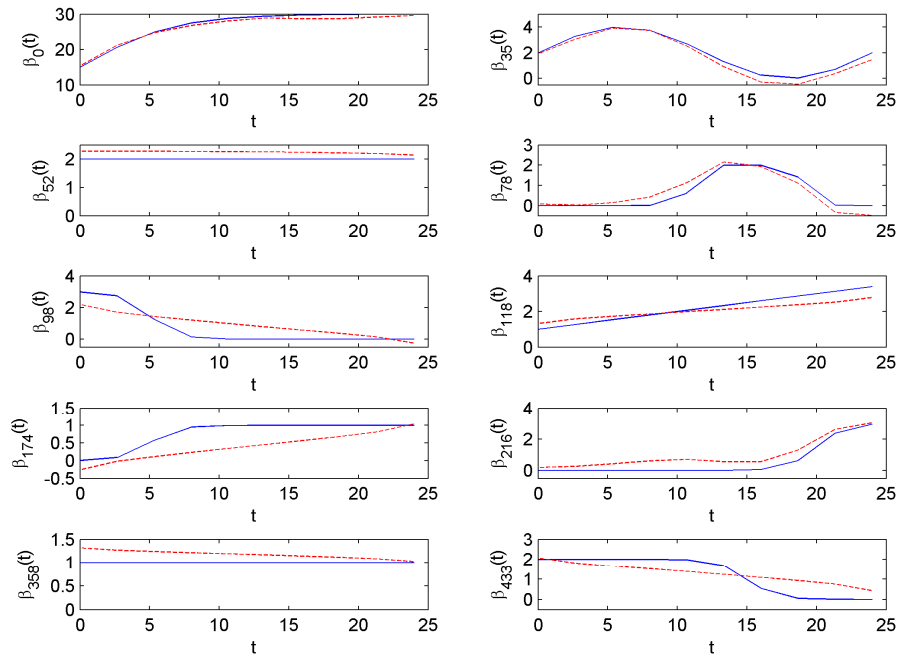

(a) Estimates of **VBfun** which assumed the AR(1) residual covariance structure

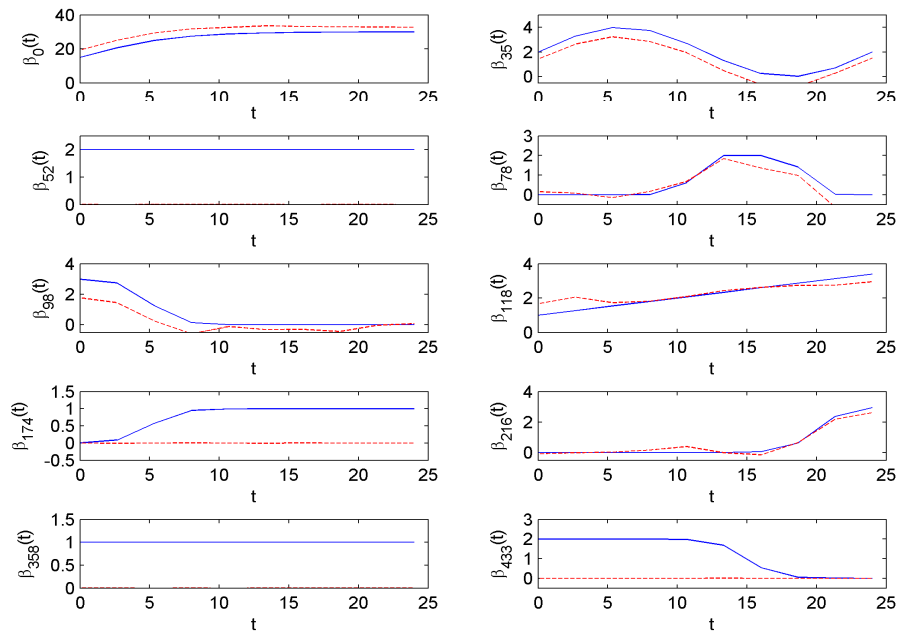

(b) Estimates of **VBnonfun** which assumed the AR(1) residual covariance structure

**Figure S5** Simulated data with  $k = 10$ ,  $u = 0:8$ : the estimated trend curves (red dashed lines) against the simulated trend curves (blue solid lines)
