# Supplementary material
Source: PubMed Central journal article supplement (PMC3730925)
Supplement: 3d760692b9947831e148b798fbd8db8e_genetics.113.152736-4.pdf [file 3d760692b9947831e148b798fbd8db8e_genetics.113.152736-4.pdf]

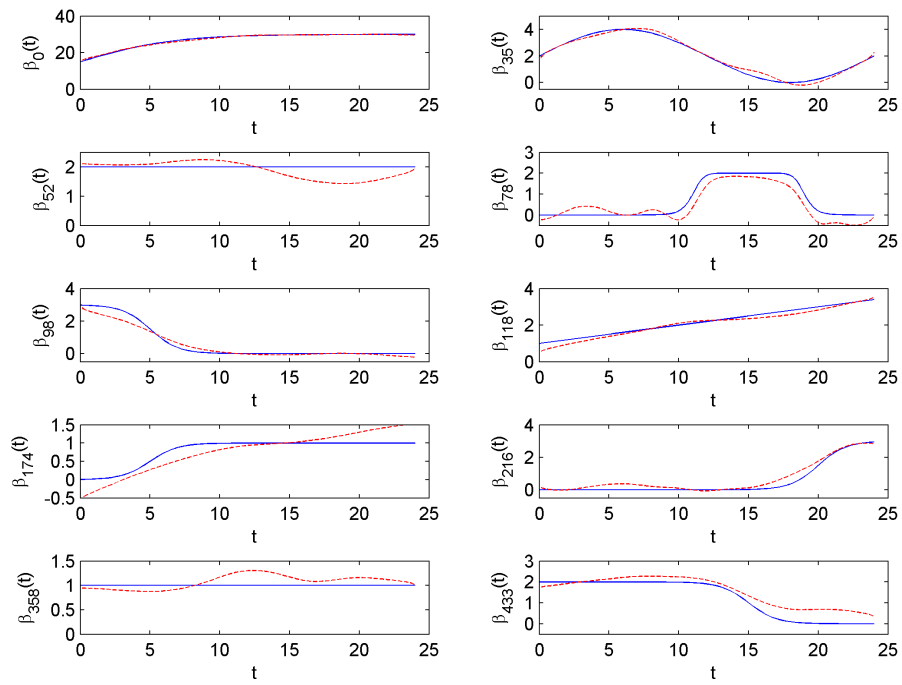

(a) Estimates of **VBfun** which assumed the diagonal residual covariance structure

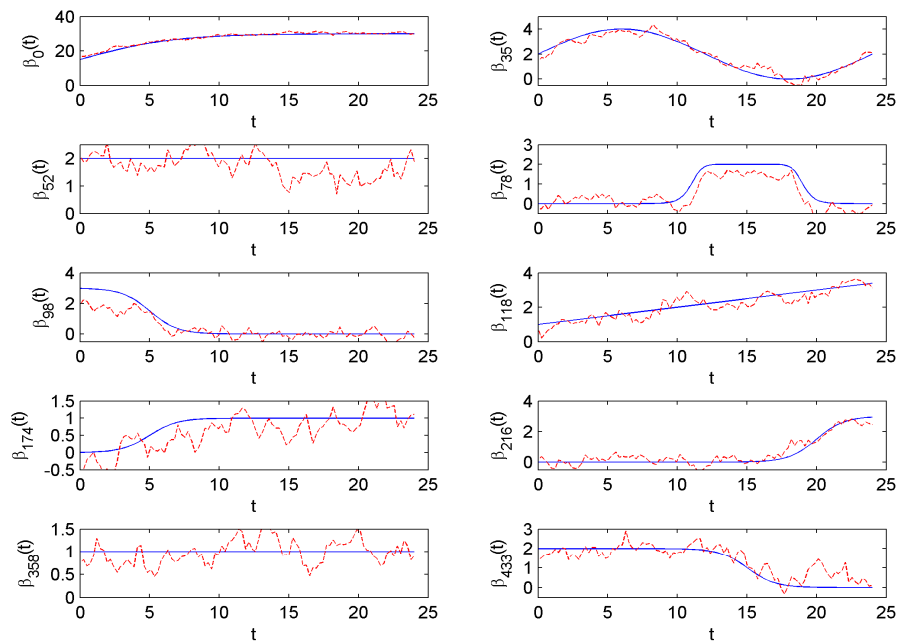

(b) Estimates of **VBnonfun** which assumed the diagonal residual covariance structure

**Figure S10** Simulated data with  $k = 100$ ,  $u = 0:8$ : the estimated trend curves (red dashed lines) against the simulated trend curves (blue solid lines)
