# Supplementary material
Source: PubMed Central journal article supplement (PMC3730925)
Supplement: 5b2373a12ec5d642344e2f6dd1be3480_genetics.113.152736-2.pdf [file 5b2373a12ec5d642344e2f6dd1be3480_genetics.113.152736-2.pdf]

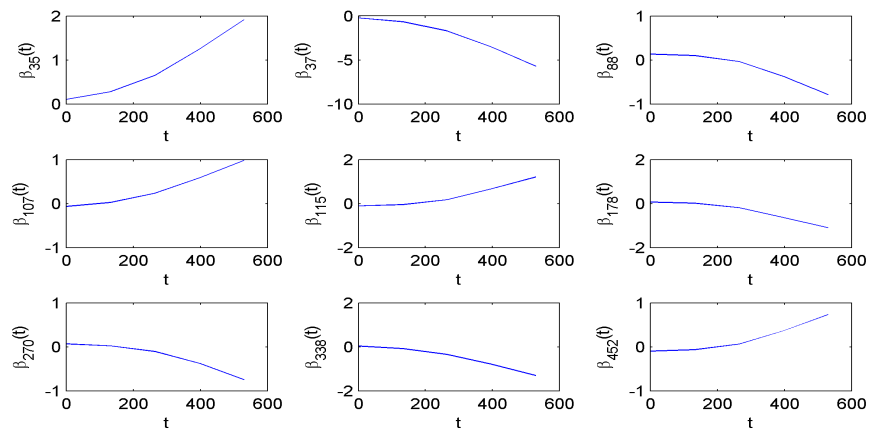

**Figure S3** QTLMAS2009 data: estimated trends of genetic effects for the 9 selected markers by using **VBnonfun** which assumed the AR(1) residual covariance structure in the model.
