# Supplementary material
Source: PubMed Central journal article supplement (PMC3730925)
Supplement: 6cd19ea8cbf5d543a192703b847acb80_genetics.113.152736-12.pdf [file 6cd19ea8cbf5d543a192703b847acb80_genetics.113.152736-12.pdf]

**Table S3** The number of times each QTL has been correctly selected over 50 replications, together with the average number of wrongly selected markers (false positives). F and N represent **VBfun** and **VBnonfun**, respectively (assuming the diagonal residual covariance structure in the model).

| QTL               | $n=200$<br>$k=10$ |      | $n=200$<br>$k=100$ |    | $n=500$<br>$k=10$ |      | $n=500$<br>$k=100$ |      |
|-------------------|-------------------|------|--------------------|----|-------------------|------|--------------------|------|
|                   | F                 | N    | F                  | N  | F                 | N    | F                  | N    |
| 35                | 50                | 50   | 50                 | 50 | 50                | 50   | 50                 | 50   |
| 52                | 17                | 0    | 50                 | 0  | 46                | 0    | 50                 | 0    |
| 78                | 10                | 1    | 50                 | 0  | 45                | 34   | 50                 | 33   |
| 98                | 6                 | 0    | 45                 | 0  | 38                | 0    | 50                 | 0    |
| 118               | 50                | 50   | 50                 | 50 | 50                | 50   | 50                 | 50   |
| 174               | 1                 | 0    | 11                 | 0  | 14                | 0    | 49                 | 0    |
| 216               | 35                | 3    | 49                 | 1  | 44                | 46   | 50                 | 41   |
| 358               | 23                | 13   | 50                 | 0  | 47                | 25   | 50                 | 30   |
| 433               | 9                 | 0    | 0                  | 43 | 34                | 0    | 50                 | 0    |
| ave. fal.<br>pos. | 1.34              | 0.38 | 1.68               | 0  | 0.90              | 0.90 | 0.24               | 0.40 |
