# Supplementary material
Source: PubMed Central journal article supplement (PMC3730925)
Supplement: 8a0648a69a2154022e3c3d5bfab4a930_genetics.113.152736-11.pdf [file 8a0648a69a2154022e3c3d5bfab4a930_genetics.113.152736-11.pdf]

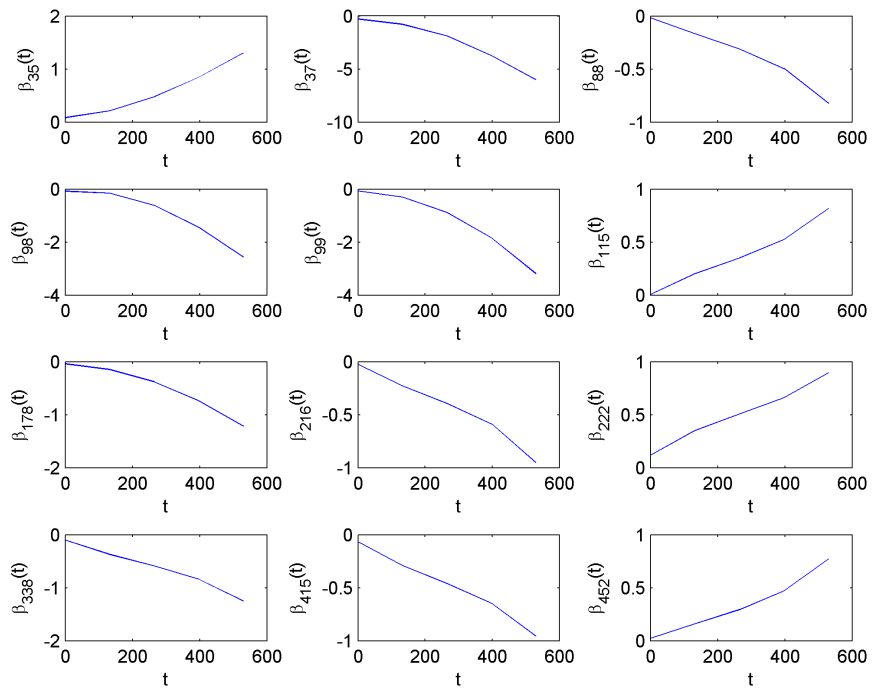

**Figure S2** QTLMAS2009 data: estimated trends of genetic effects for the 12 selected markers by using **VBfun** which assumed the AR(1) residual covariance structure in the model.
