# Supplementary material
Source: PubMed Central journal article supplement (PMC3730925)
Supplement: 099eabf436f034421b36cc8aa58f52b9_genetics.113.152736-10.pdf [file 099eabf436f034421b36cc8aa58f52b9_genetics.113.152736-10.pdf]

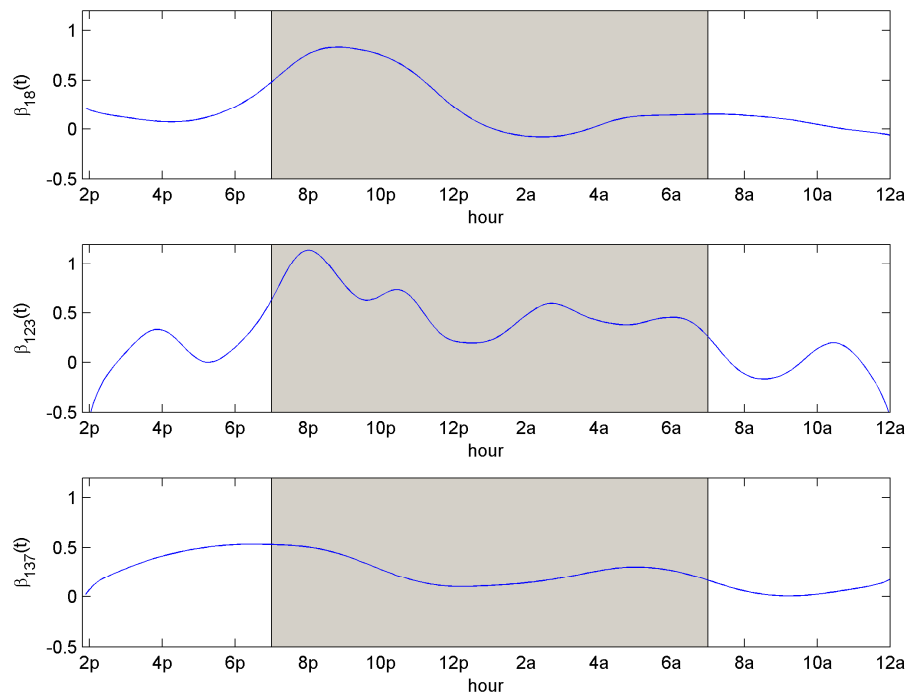

**Figure S11** The results of mouse behavioral data analysis by using **VBfun** which assumed the diagonal residual covariance structure: estimated trends of genetic effects (in logit scale) for markers 18, 123, and 137, respectively. The shadow area represents the dark period (7pm-7am).
