# Supplementary material
Source: PubMed Central journal article supplement (PMC3730925)
Supplement: 541d69410fc71a5c61328c02ec36cc58_genetics.113.152736-16.pdf [file 541d69410fc71a5c61328c02ec36cc58_genetics.113.152736-16.pdf]

**Table S1** The results of QTLMAS2009 data analysis, including the selected markers, their locations (in brackets), the corresponding Wald scores, and the closest true simulated QTLs. Regarding to the Wald tests, the critical value corresponding to the significance level 0:05 is 18.31 for the estimates of VBfun (chi-square distribution with 10 degrees of freedom), and 11.07 for the estimates of VBnonfun (with 5 df), respectively (assuming the AR(1) residual covariance structure in the model). The symbols \*, † and ‡ indicate the simulated QTLs effects on  $\phi_1$ ,  $\phi_2$ ,  $\phi_3$  of the simulated logistic growth curves (traits), respectively.

| Marker       | VBfun   |              | VBnonfun |                   | Closest simulated QTL |
|--------------|---------|--------------|----------|-------------------|-----------------------|
|              | Marker  | Wald score   | Marker   | Wald score        |                       |
| 35 (0.4029)  | 163.63  | 35 (0.4029)  | 335.64   | (0.4525) 36-37*   |                       |
| 37 (0.4447)  | 5844.14 | 37 (0.4447)  | 5019.23  | (0.4525) 36-37*   |                       |
| 88 (0.9952)  | 82.39   | 88 (0.9952)  | 112.35   | (0.8765) 77-78‡   |                       |
| 98 (1.0359)  | 1150.48 | none         | none     | (1.0455) 98-99*   |                       |
| 99(1.0516)   | 1914.20 | 107(1.1536)  | 130.01   | (1.0455) 98-99*   |                       |
| 115(1.2566)  | 63.13   | 115(1.2566)  | 177.15   | (1.3302) 118-119† |                       |
| 178 (1.9011) | 178.99  | 178 (1.9011) | 168.59   | (1.8864) 174-175* |                       |
| 216 (1.9011) | 102.91  | none         | none     | (2.2622) 216-217* |                       |
| 222 (2.3108) | 68.81   | none         | none     | (2.2622) 216-217‡ |                       |
| none         | none    | 270 (2.8203) | 73.85    | (2.8984) 276-277* |                       |
| 338(3.7168)  | 154.04  | 338(3.7168)  | 202.16   | (3.6979) 336-337* |                       |
| 415(4.6311)  | 95.59   | none         | none     | (4.5971) 411-412† |                       |
| 452 (4.9494) | 57.88   | 452( 4.9494) | 74.86    | (4.7719) 432-433* |                       |
