# Supplementary material
Source: PubMed Central journal article supplement (PMC3730925)
Supplement: 814c37fe59efb02040fee5038f3e6fa4_genetics.113.152736-15.pdf [file 814c37fe59efb02040fee5038f3e6fa4_genetics.113.152736-15.pdf]

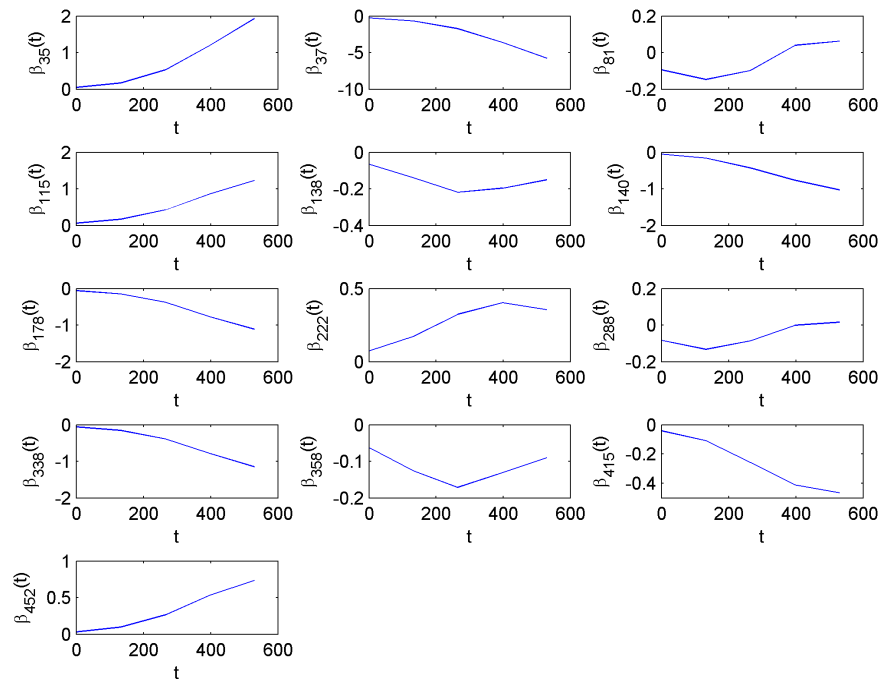

**Figure S1** QTLMAS2009 data: estimated trends of genetic effects for the 13 selected markers by using **VBnonfun** which assumed the diagonal residual covariance structure.

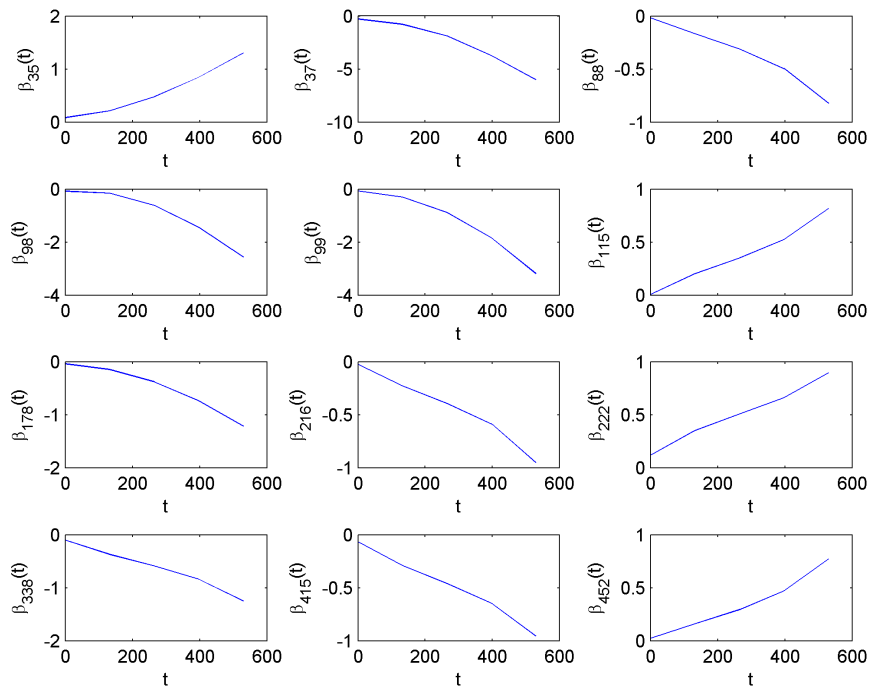

**Figure S2** QTLMAS2009 data: estimated trends of genetic effects for the 12 selected markers by using **VBfun** which assumed the AR(1) residual covariance structure in the model.

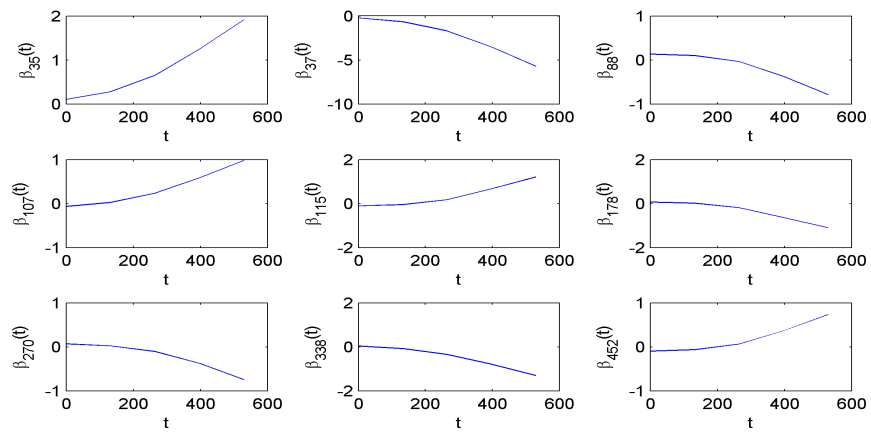

**Figure S3** QTLMAS2009 data: estimated trends of genetic effects for the 9 selected markers by using **VBnonfun** which assumed the AR(1) residual covariance structure in the model.

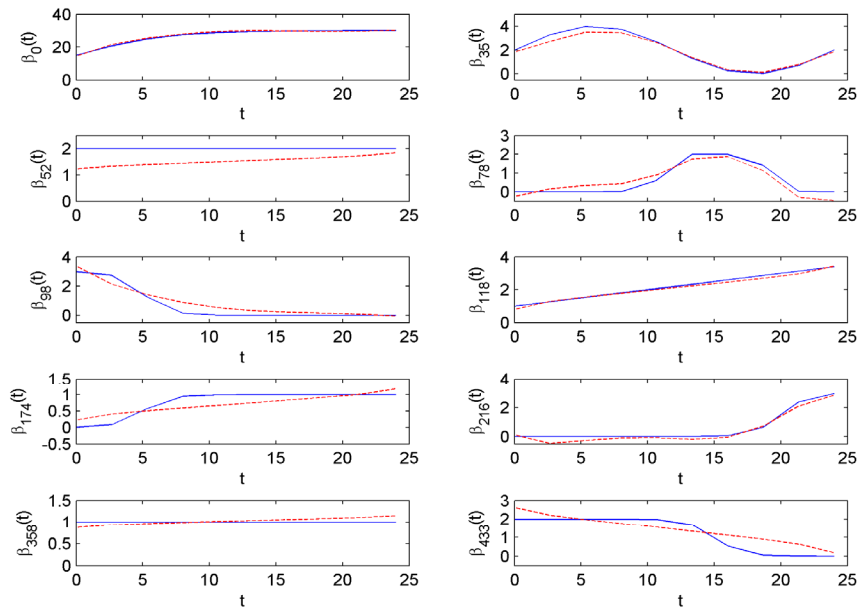

(a) Estimates of **VBfun** which assumed the AR(1) residual covariance structure

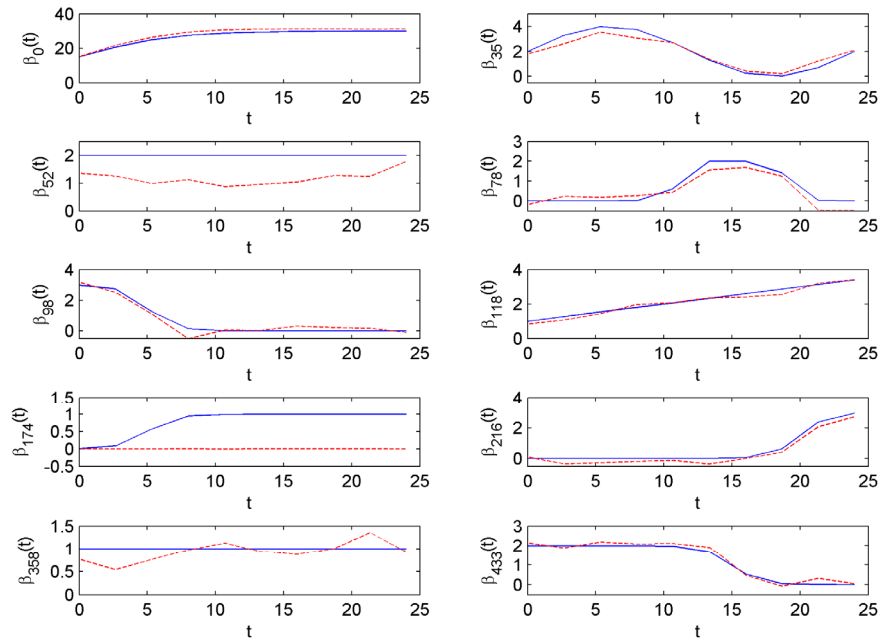

(b) Estimates of **VBnonfun** which assumed the AR(1) residual covariance structure

**Figure S4** Simulated data with  $k = 10$ ,  $u = 0:5$ : the estimated trend curves (red dashed lines) against the simulated trend curves (blue solid lines)

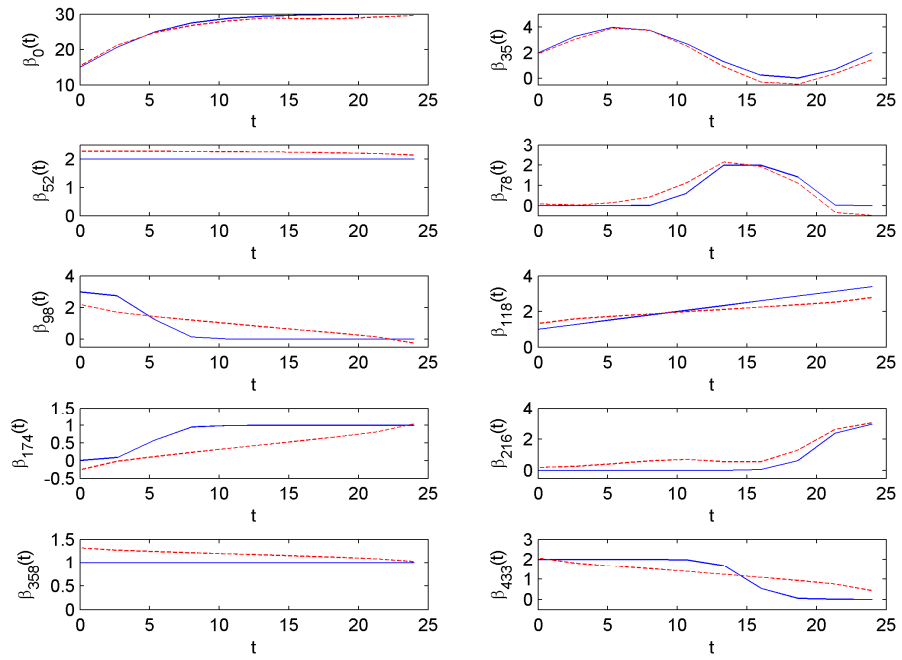

(a) Estimates of **VBfun** which assumed the AR(1) residual covariance structure

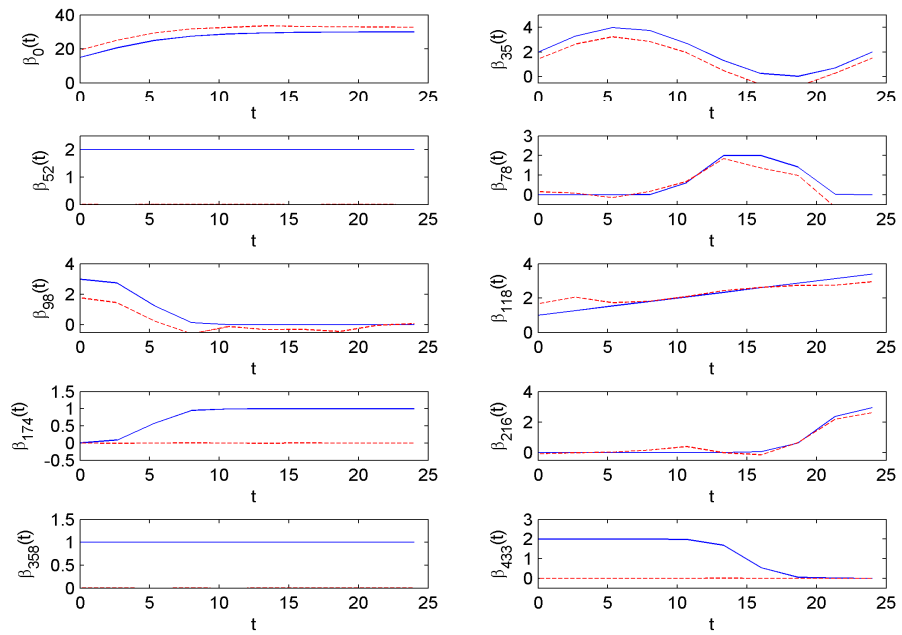

(b) Estimates of **VBnonfun** which assumed the AR(1) residual covariance structure

**Figure S5** Simulated data with  $k = 10$ ,  $u = 0:8$ : the estimated trend curves (red dashed lines) against the simulated trend curves (blue solid lines)

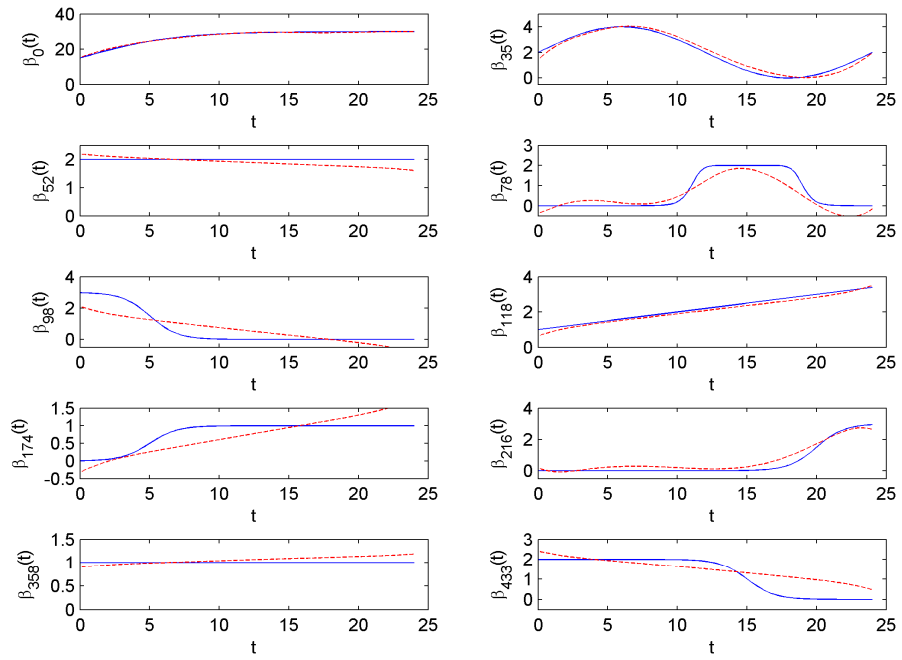

(a) Estimates of **VBfun** which assumed the AR(1) residual covariance structure

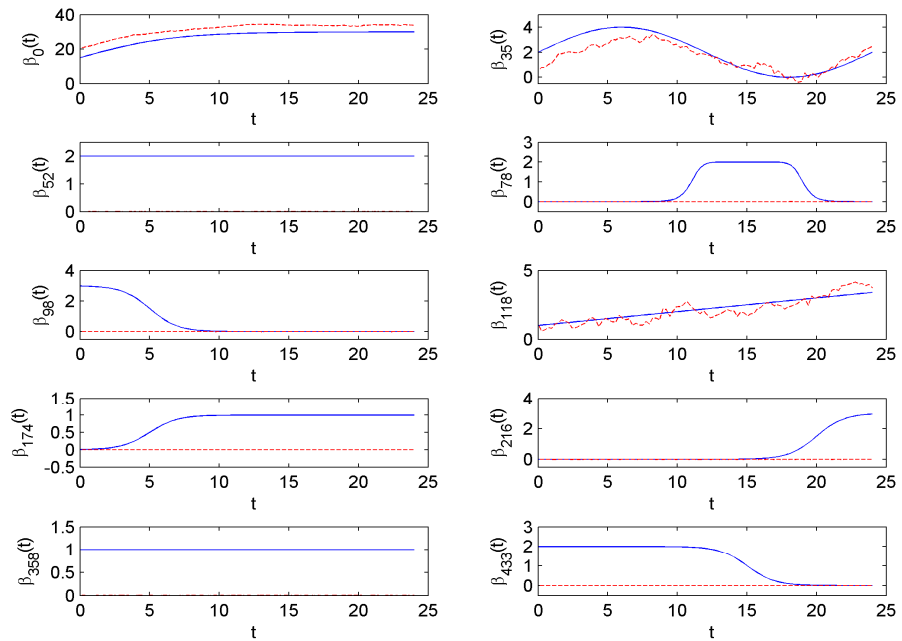

(b) Estimates of **VBnonfun** which assumed the AR(1) residual covariance structure

**Figure S6** Simulated data with  $k = 100$ ,  $u = 0:8$ : the estimated trend curves (red dashed lines) against the simulated trend curves (blue solid lines)

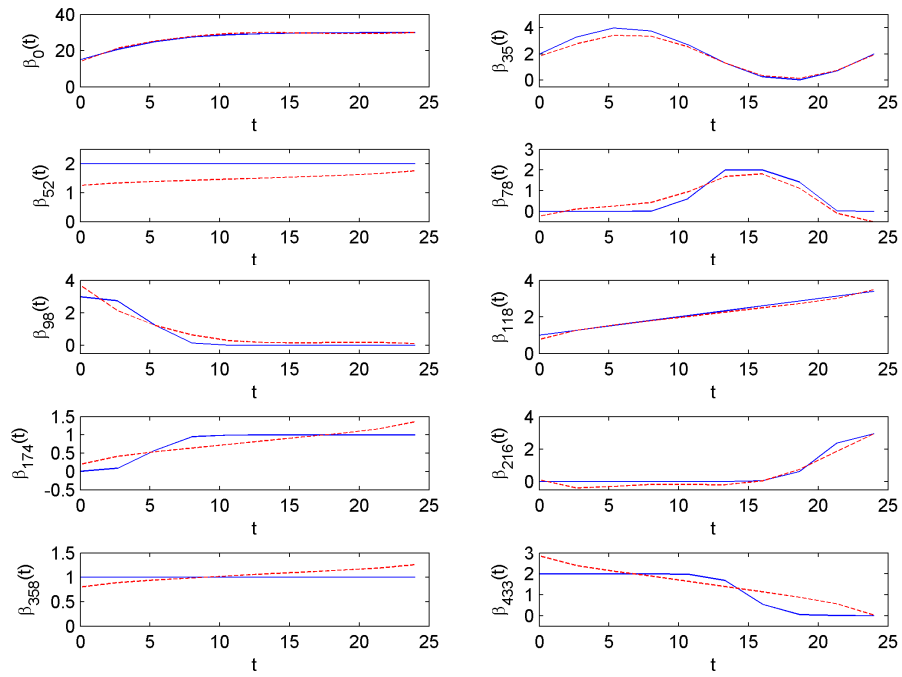

(a) Estimates of **VBfun** which assumed the diagonal residual covariance structure

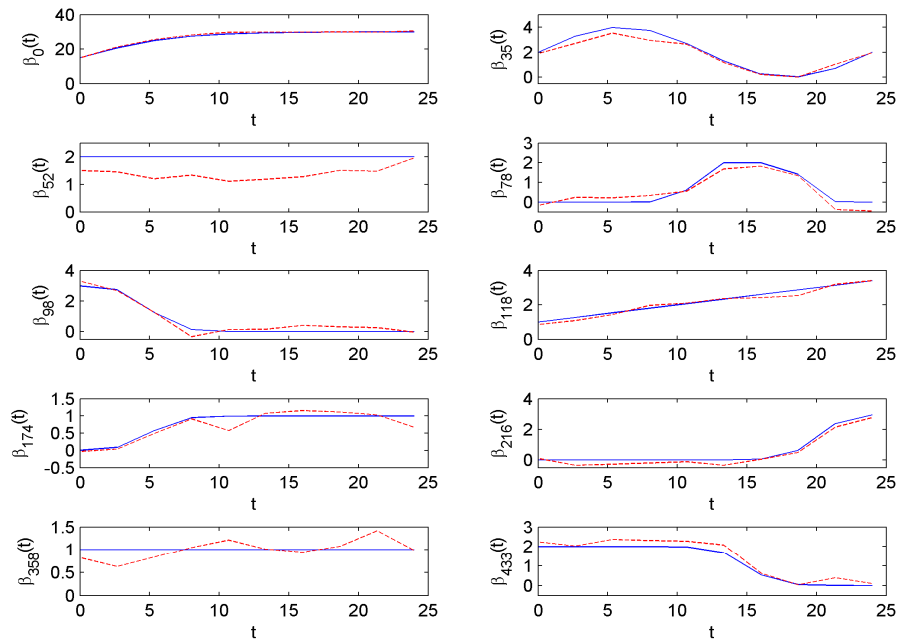

(b) Estimates of **VBnonfun** which assumed the diagonal residual covariance structure

**Figure S7** Simulated data with  $k = 10$ ,  $u = 0:5$ : the estimated trend curves (red dashed lines) against the simulated trend curves (blue solid lines)

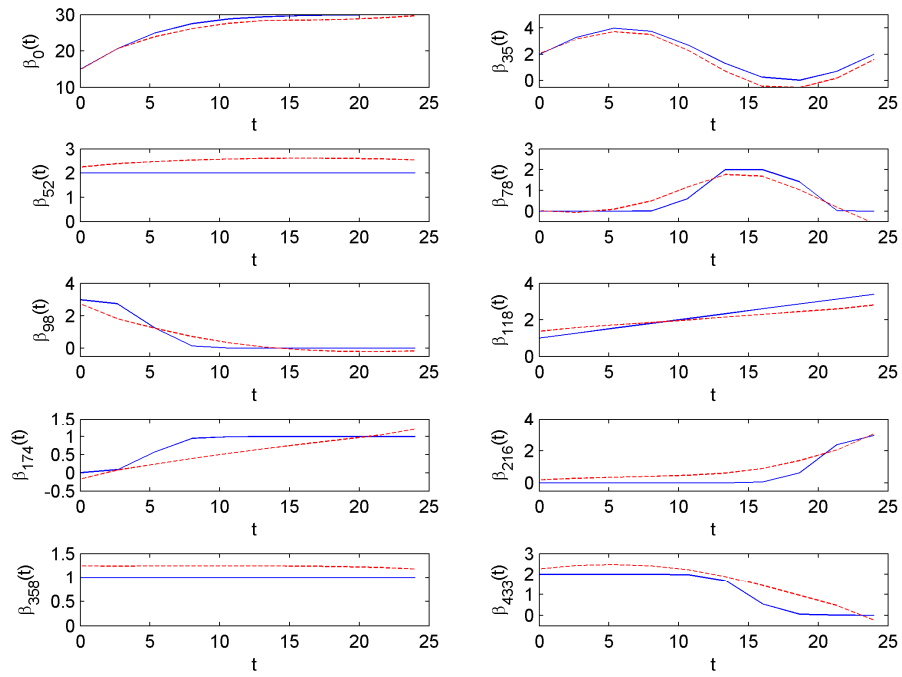

(a) Estimates of **VBfun** which assumed the diagonal residual covariance structure

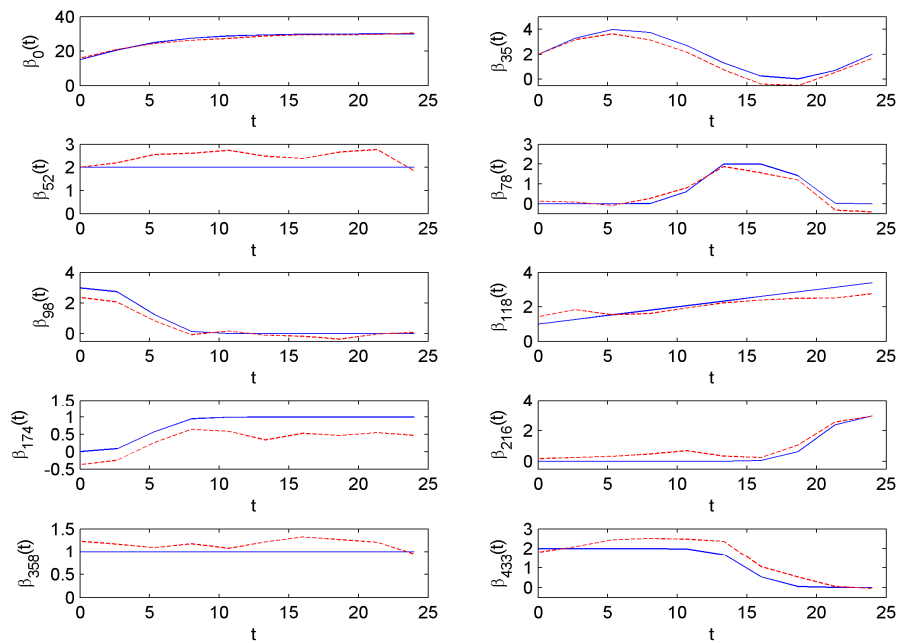

(b) Estimates of **VBnonfun** which assumed the diagonal residual covariance structure

**Figure S8** Simulated data with  $k = 10$ ,  $u = 0:8$ : the estimated trend curves (red dashed lines) against the simulated trend curves (blue solid lines)



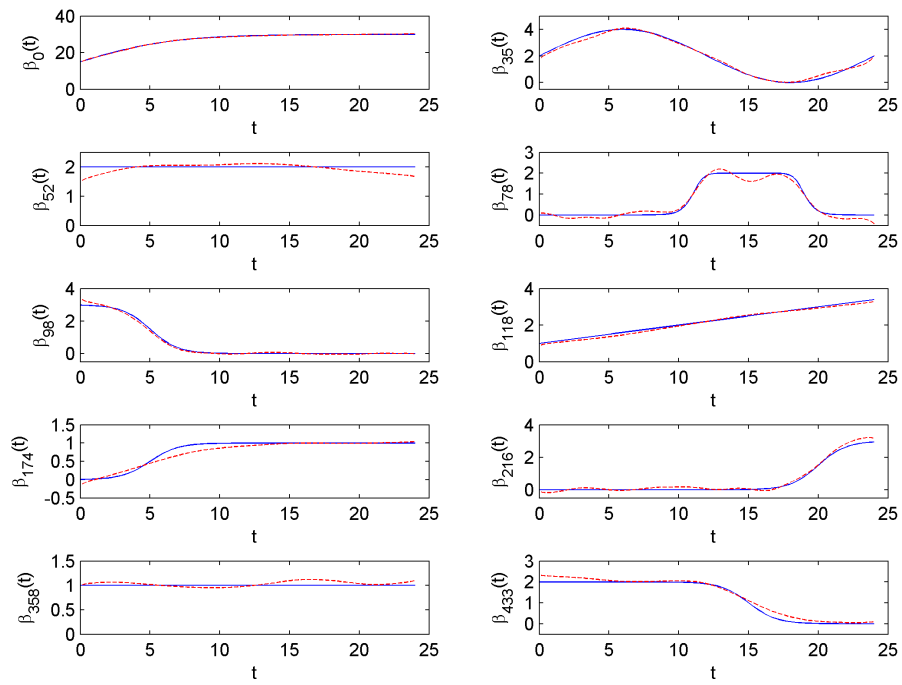

(a) Estimates of **VBfun** which assumed the diagonal residual covariance structure

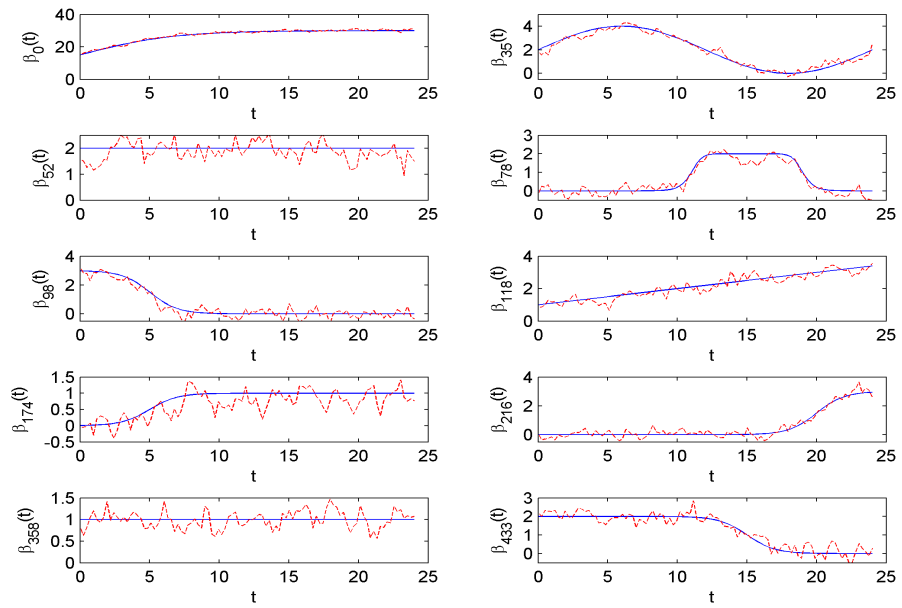

(b) Estimates of **VBnonfun** which assumed the diagonal residual covariance structure

**Figure S9** Simulated data with  $k = 100$ ,  $u = 0:5$ : the estimated trend curves (red dashed lines) against the simulated trend curves (blue solid lines)

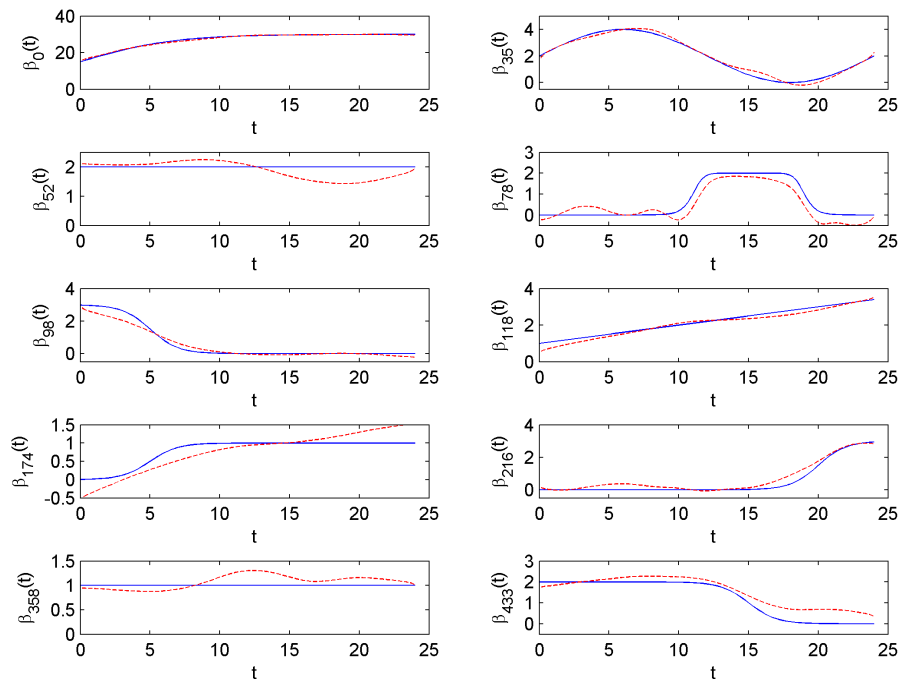

(a) Estimates of **VBfun** which assumed the diagonal residual covariance structure

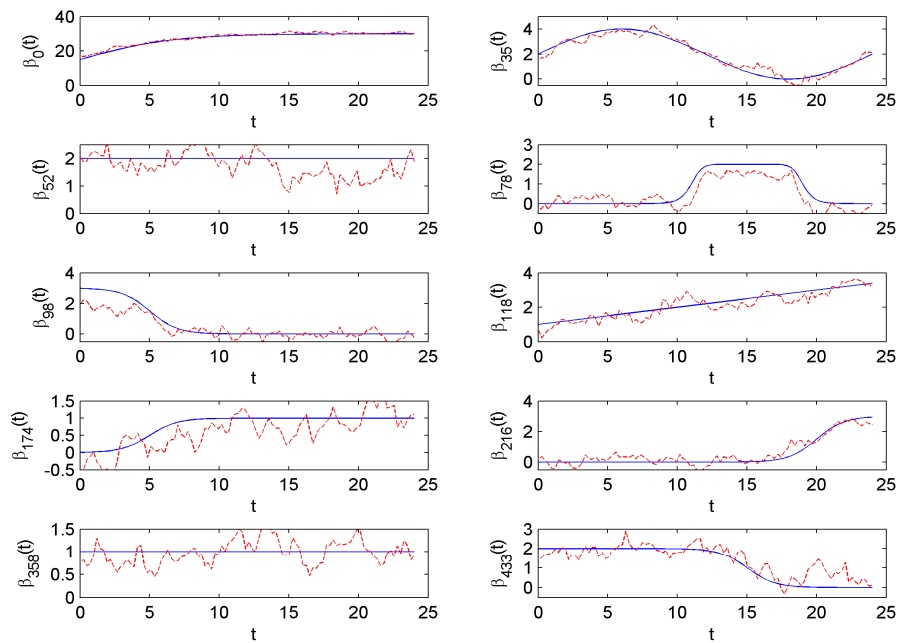

(b) Estimates of **VBnonfun** which assumed the diagonal residual covariance structure

**Figure S10** Simulated data with  $k = 100$ ,  $u = 0:8$ : the estimated trend curves (red dashed lines) against the simulated trend curves (blue solid lines)

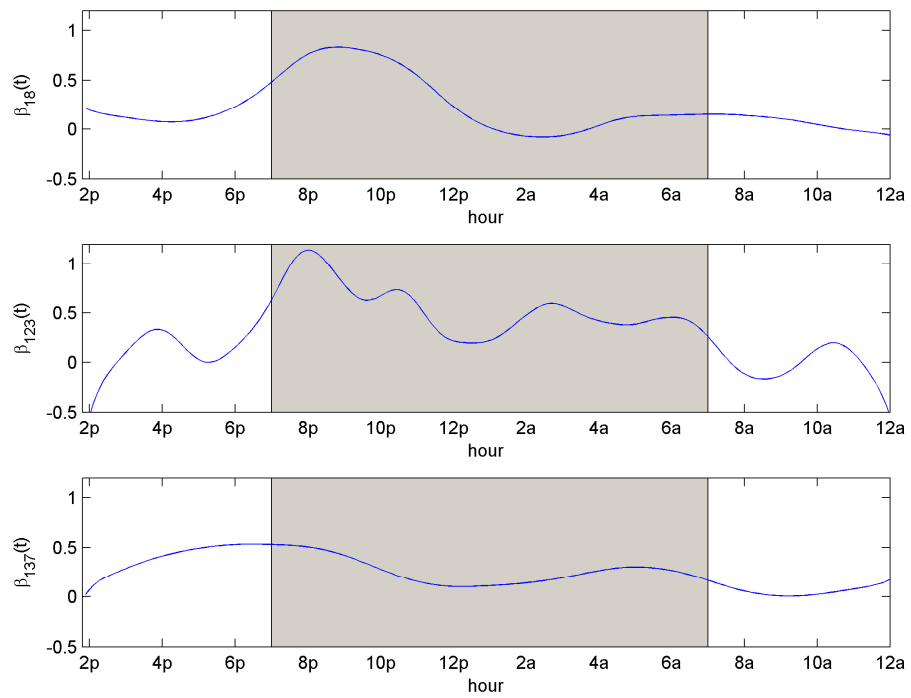

**Figure S11** The results of mouse behavioral data analysis by using **VBfun** which assumed the diagonal residual covariance structure: estimated trends of genetic effects (in logit scale) for markers 18, 123, and 137, respectively. The shadow area represents the dark period (7pm-7am).

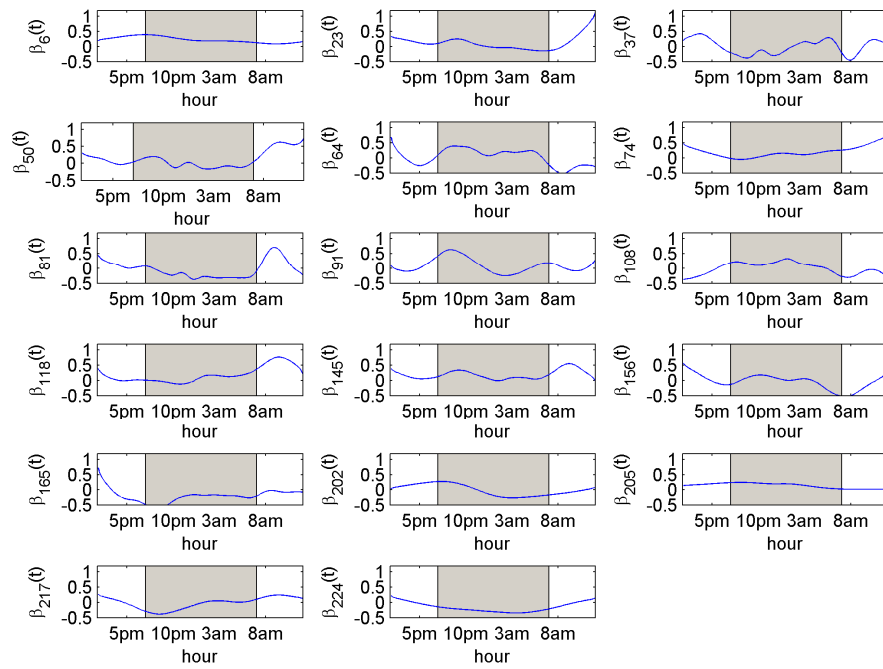

**Figure S12** Mouse behavioral data: estimated trends of genetic effects (in logit scale) for markers 6, 23, 37, 50, 64, 74, 81, 91, 108, 118, 145, 156, 165, 202, 205, 217 and 224 by using **VBfun** which assumed the diagonal residual covariance structure. The shadow area represents the dark period (7pm-7am).

**File S1**

**MATLAB codes for implementing VBfun and VBnonfun methods**

File S1 is available for download at  
<http://www.genetics.org/lookup/suppl/doi:10.1534/genetics.113.152736/-/DC1>.

**Table S1** The results of QTLMAS2009 data analysis, including the selected markers, their locations (in brackets), the corresponding Wald scores, and the closest true simulated QTLs. Regarding to the Wald tests, the critical value corresponding to the significance level 0:05 is 18.31 for the estimates of VBfun (chi-square distribution with 10 degrees of freedom), and 11.07 for the estimates of VBnonfun (with 5 df), respectively (assuming the AR(1) residual covariance structure in the model). The symbols \*, † and ‡ indicate the simulated QTLs effects on  $\phi_1$ ,  $\phi_2$ ,  $\phi_3$  of the simulated logistic growth curves (traits), respectively.

| Marker       | VBfun   |              | VBnonfun |                   | Closest simulated QTL |
|--------------|---------|--------------|----------|-------------------|-----------------------|
|              | Marker  | Wald score   | Marker   | Wald score        |                       |
| 35 (0.4029)  | 163.63  | 35 (0.4029)  | 335.64   | (0.4525) 36-37*   |                       |
| 37 (0.4447)  | 5844.14 | 37 (0.4447)  | 5019.23  | (0.4525) 36-37*   |                       |
| 88 (0.9952)  | 82.39   | 88 (0.9952)  | 112.35   | (0.8765) 77-78‡   |                       |
| 98 (1.0359)  | 1150.48 | none         | none     | (1.0455) 98-99*   |                       |
| 99(1.0516)   | 1914.20 | 107(1.1536)  | 130.01   | (1.0455) 98-99*   |                       |
| 115(1.2566)  | 63.13   | 115(1.2566)  | 177.15   | (1.3302) 118-119† |                       |
| 178 (1.9011) | 178.99  | 178 (1.9011) | 168.59   | (1.8864) 174-175* |                       |
| 216 (1.9011) | 102.91  | none         | none     | (2.2622) 216-217* |                       |
| 222 (2.3108) | 68.81   | none         | none     | (2.2622) 216-217‡ |                       |
| none         | none    | 270 (2.8203) | 73.85    | (2.8984) 276-277* |                       |
| 338(3.7168)  | 154.04  | 338(3.7168)  | 202.16   | (3.6979) 336-337* |                       |
| 415(4.6311)  | 95.59   | none         | none     | (4.5971) 411-412† |                       |
| 452 (4.9494) | 57.88   | 452( 4.9494) | 74.86    | (4.7719) 432-433* |                       |

**Table S2** The mean squared error comparing the estimated trend functions to the simulated ones. F and N represent **VBfun** and **VBnonfun** (assuming the diagonal residual covariance structure in the model), respectively (assuming the diagonal residual covariance structure in the model), and  $h^2$  is the averaged heritability over time.

|     | $k=10$<br>$u=0.5$<br>$h^2=0.2265$ |        | $k=10$<br>$u=0.8$<br>$h^2=0.0922$ |        | $k=100$<br>$u=0.5$<br>$h^2=0.2347$ |        | $k=100$<br>$u=0.8$<br>$h^2=0.1259$ |        |
|-----|-----------------------------------|--------|-----------------------------------|--------|------------------------------------|--------|------------------------------------|--------|
|     | F                                 | N      | F                                 | N      | F                                  | N      | F                                  | N      |
| 0   | 0.1765                            | 0.2481 | 0.9436                            | 0.5591 | 0.0199                             | 0.4005 | 0.1113                             | 0.6785 |
| 35  | 0.0896                            | 0.1279 | 0.1863                            | 0.1882 | 0.0188                             | 0.0811 | 0.0341                             | 0.1163 |
| 52  | 0.2814                            | 0.4121 | 0.2839                            | 0.2703 | 0.0245                             | 0.1376 | 0.0918                             | 0.2739 |
| 78  | 0.0840                            | 0.0748 | 0.1214                            | 0.0667 | 0.0256                             | 0.0693 | 0.1312                             | 0.2146 |
| 98  | 0.0997                            | 0.0710 | 0.1480                            | 0.1233 | 0.0073                             | 0.0931 | 0.0584                             | 0.2867 |
| 118 | 0.0067                            | 0.0245 | 0.1209                            | 0.1550 | 0.0071                             | 0.0719 | 0.0273                             | 0.1222 |
| 174 | 0.0327                            | 0.0341 | 0.0877                            | 0.2032 | 0.0087                             | 0.0941 | 0.0732                             | 0.1650 |
| 216 | 0.0658                            | 0.0478 | 0.2431                            | 0.1284 | 0.0157                             | 0.0608 | 0.0574                             | 0.1031 |
| 358 | 0.0221                            | 0.0432 | 0.0556                            | 0.0403 | 0.0036                             | 0.0403 | 0.0230                             | 0.0717 |
| 453 | 0.1556                            | 0.0706 | 0.2629                            | 0.0403 | 0.0225                             | 0.0864 | 0.1547                             | 0.2198 |

**Table S3** The number of times each QTL has been correctly selected over 50 replications, together with the average number of wrongly selected markers (false positives). F and N represent **VBfun** and **VBnonfun**, respectively (assuming the diagonal residual covariance structure in the model).

| QTL               | $n=200$<br>$k=10$ |      | $n=200$<br>$k=100$ |    | $n=500$<br>$k=10$ |      | $n=500$<br>$k=100$ |      |
|-------------------|-------------------|------|--------------------|----|-------------------|------|--------------------|------|
|                   | F                 | N    | F                  | N  | F                 | N    | F                  | N    |
| 35                | 50                | 50   | 50                 | 50 | 50                | 50   | 50                 | 50   |
| 52                | 17                | 0    | 50                 | 0  | 46                | 0    | 50                 | 0    |
| 78                | 10                | 1    | 50                 | 0  | 45                | 34   | 50                 | 33   |
| 98                | 6                 | 0    | 45                 | 0  | 38                | 0    | 50                 | 0    |
| 118               | 50                | 50   | 50                 | 50 | 50                | 50   | 50                 | 50   |
| 174               | 1                 | 0    | 11                 | 0  | 14                | 0    | 49                 | 0    |
| 216               | 35                | 3    | 49                 | 1  | 44                | 46   | 50                 | 41   |
| 358               | 23                | 13   | 50                 | 0  | 47                | 25   | 50                 | 30   |
| 433               | 9                 | 0    | 0                  | 43 | 34                | 0    | 50                 | 0    |
| ave. fal.<br>pos. | 1.34              | 0.38 | 1.68               | 0  | 0.90              | 0.90 | 0.24               | 0.40 |



**Table S4** The results of mouse behavioral data analysis by using VBfun which assumed the AR(1) residual covariance structure, including the selected markers, their chromosomes, locations, and the corresponding Wald scores. Regarding to the Wald tests, the critical value corresponding to the significance level 0:05 is 67.50 for the estimates (chi-square distribution with 50 degrees of freedom).

| Marker              | Chromosome | Location (cM) | Wald Score |
|---------------------|------------|---------------|------------|
| 6 (gnf01_085_746)   | 1          | 43.48         | 292.83     |
| 18 (rs3689947)      | 1          | 96.11         | 795.93     |
| 23 (rs13476507)     | 2          | 30.83         | 173.80     |
| 37 (rs13477019)     | 3          | 9.16          | 277.01     |
| 50 (rs3657112)      | 3          | 75.42         | 206.72     |
| 64 (rs3688968)      | 4          | 54.61         | 353.39     |
| 74 (rs3726547)      | 5          | 50.68         | 278.76     |
| 81 (rs13478621)     | 6          | 4.38          | 441.15     |
| 91 (rs6387265)      | 6          | 77.70         | 426.03     |
| 108 (rs6216320)     | 7          | 69.01         | 280.63     |
| 118 (gnf08_109_993) | 8          | 53.04         | 360.41     |
| 123 (rs6207781)     | 9          | 20.74         | 1242.01    |
| 137 (rs13480657)    | 10         | 39.72         | 379.31     |
| 145 (rs3023251)     | 11         | 13.71         | 241.39     |
| 156 (rs13481230)    | 11         | 75.02         | 256.88     |
| 165 (rs13481509)    | 12         | 26.44         | 194.32     |
| 202 (rs6326790)     | 15         | 45.98         | 346.22     |
| 205 (rs4180773)     | 16         | 29.53         | 175.19     |
| 217 (rs4231494)     | 17         | 19.56         | 183.36     |
| 224 (rs6358426)     | 18         | 10.10         | 375.13     |
