# Supplementary material
Source: PubMed Central journal article supplement (PMC3730925)
Supplement: 1181ba351cc82fd118ff792d8160618b_genetics.113.152736-3.pdf [file 1181ba351cc82fd118ff792d8160618b_genetics.113.152736-3.pdf]

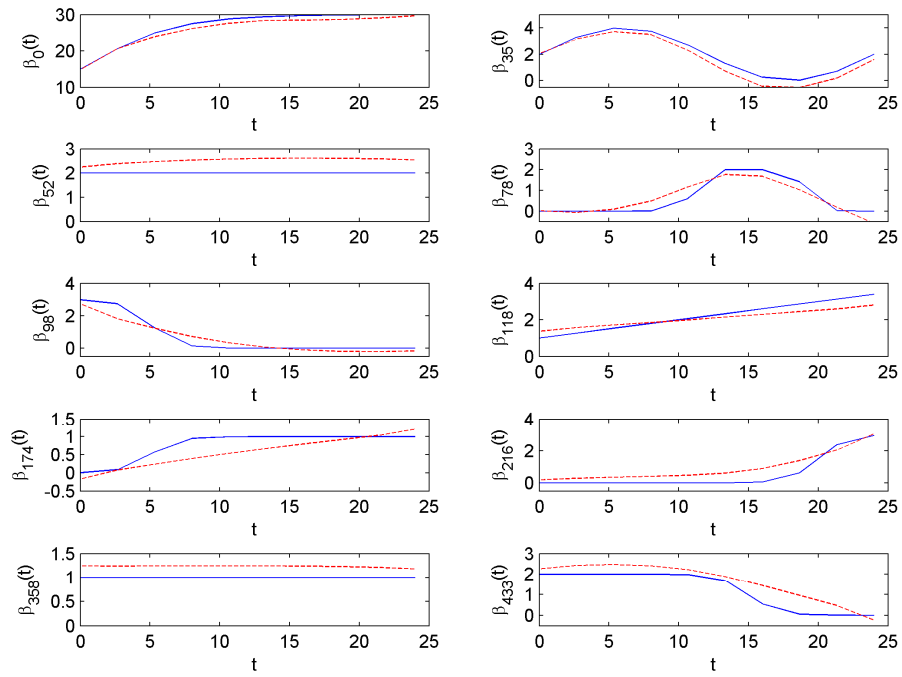

(a) Estimates of **VBfun** which assumed the diagonal residual covariance structure

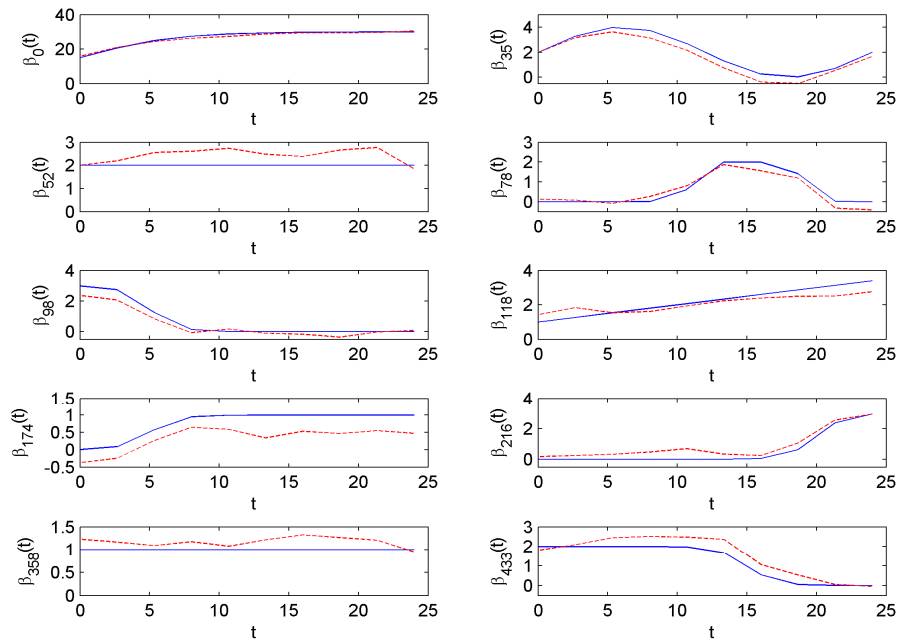

(b) Estimates of **VBnonfun** which assumed the diagonal residual covariance structure

**Figure S8** Simulated data with  $k = 10$ ,  $u = 0:8$ : the estimated trend curves (red dashed lines) against the simulated trend curves (blue solid lines)
