# Supplementary material
Source: PubMed Central journal article supplement (PMC3730925)
Supplement: 3648c513ff2395ddbf3dad5535101fe7_genetics.113.152736-7.pdf [file 3648c513ff2395ddbf3dad5535101fe7_genetics.113.152736-7.pdf]

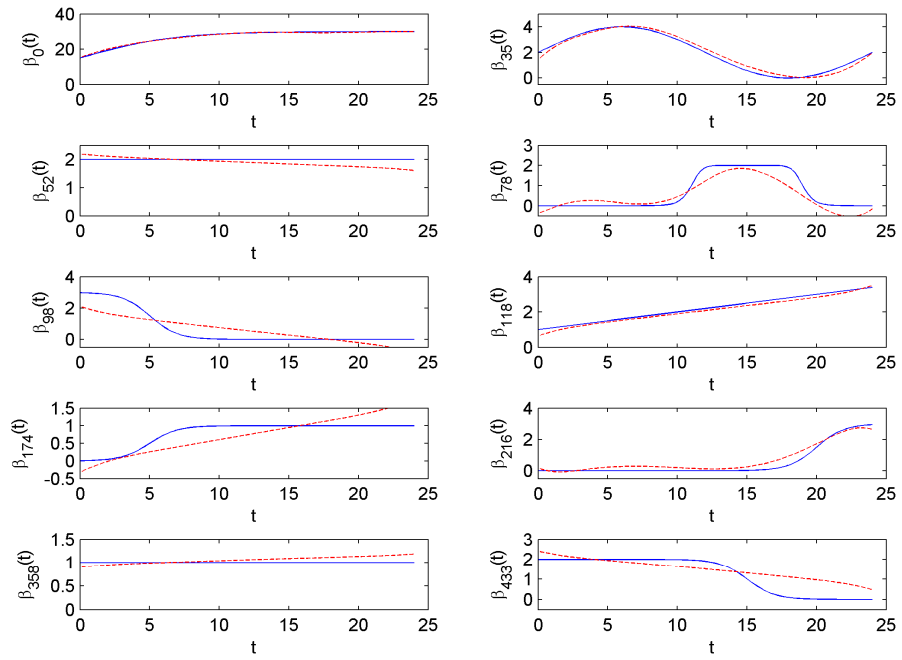

(a) Estimates of **VBfun** which assumed the AR(1) residual covariance structure

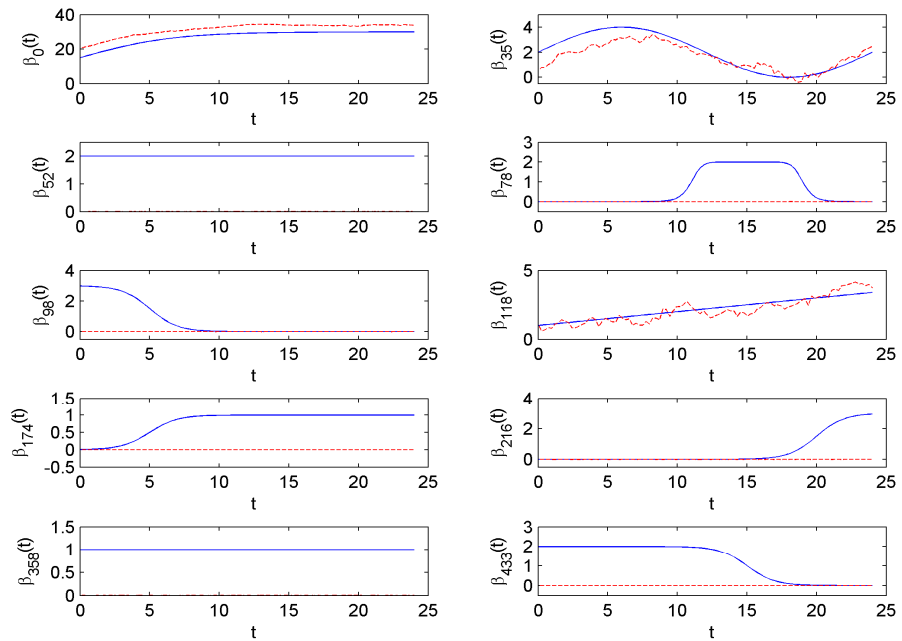

(b) Estimates of **VBnonfun** which assumed the AR(1) residual covariance structure

**Figure S6** Simulated data with  $k = 100$ ,  $u = 0:8$ : the estimated trend curves (red dashed lines) against the simulated trend curves (blue solid lines)
