# Supplementary material
Source: PubMed Central journal article supplement (PMC3730925)
Supplement: cddc7890045280393c7944ca72bc10d9_genetics.113.152736-5.pdf [file cddc7890045280393c7944ca72bc10d9_genetics.113.152736-5.pdf]

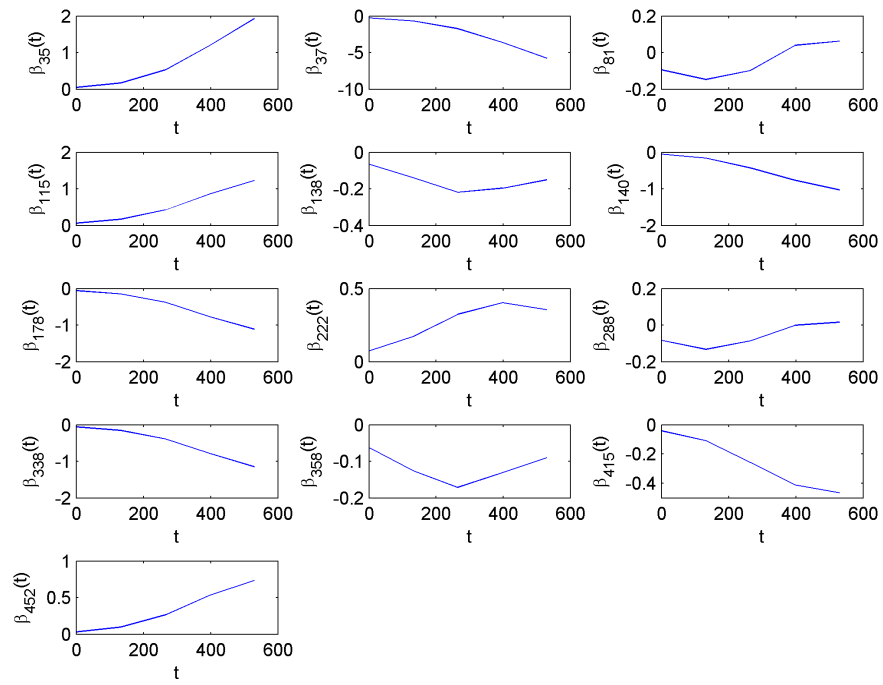

**Figure S1** QTLMAS2009 data: estimated trends of genetic effects for the 13 selected markers by using **VBnonfun** which assumed the diagonal residual covariance structure.
