# Supplementary material
Source: PubMed Central journal article supplement (PMC3730925)
Supplement: e465d1d8633c57aed25efb31b467f813_genetics.113.152736-14.pdf [file e465d1d8633c57aed25efb31b467f813_genetics.113.152736-14.pdf]

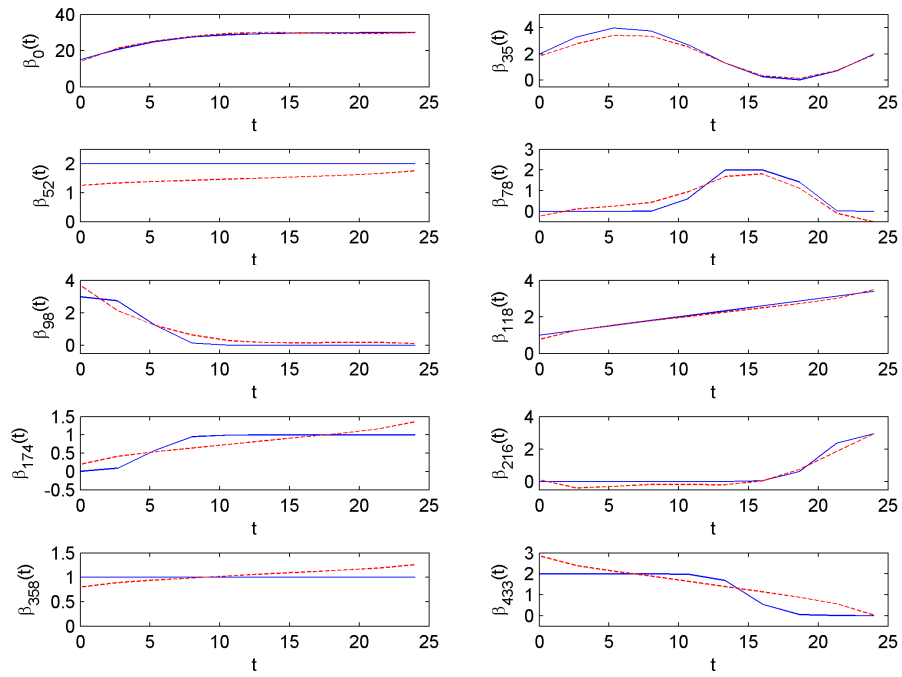

(a) Estimates of **VBfun** which assumed the diagonal residual covariance structure

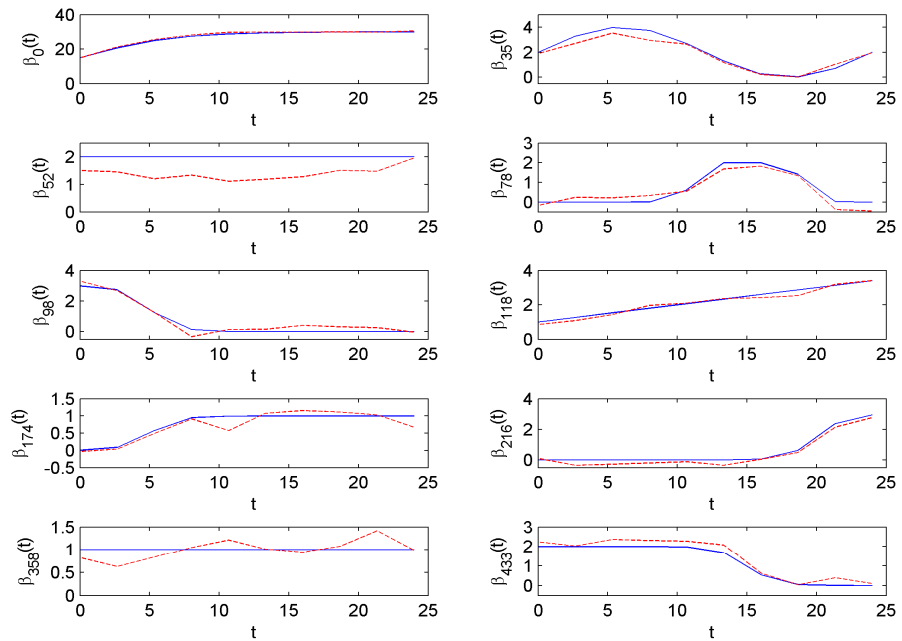

(b) Estimates of **VBnonfun** which assumed the diagonal residual covariance structure

**Figure S7** Simulated data with  $k = 10$ ,  $u = 0:5$ : the estimated trend curves (red dashed lines) against the simulated trend curves (blue solid lines)
