# Supplementary material
Source: PubMed Central journal article supplement (PMC3730925)
Supplement: f11f4e36b13c5b59d2e62b224d56e4bb_genetics.113.152736-1.pdf [file f11f4e36b13c5b59d2e62b224d56e4bb_genetics.113.152736-1.pdf]

**Table S4** The results of mouse behavioral data analysis by using VBfun which assumed the AR(1) residual covariance structure, including the selected markers, their chromosomes, locations, and the corresponding Wald scores. Regarding to the Wald tests, the critical value corresponding to the significance level 0:05 is 67.50 for the estimates (chi-square distribution with 50 degrees of freedom).

| Marker              | Chromosome | Location (cM) | Wald Score |
|---------------------|------------|---------------|------------|
| 6 (gnf01_085_746)   | 1          | 43.48         | 292.83     |
| 18 (rs3689947)      | 1          | 96.11         | 795.93     |
| 23 (rs13476507)     | 2          | 30.83         | 173.80     |
| 37 (rs13477019)     | 3          | 9.16          | 277.01     |
| 50 (rs3657112)      | 3          | 75.42         | 206.72     |
| 64 (rs3688968)      | 4          | 54.61         | 353.39     |
| 74 (rs3726547)      | 5          | 50.68         | 278.76     |
| 81 (rs13478621)     | 6          | 4.38          | 441.15     |
| 91 (rs6387265)      | 6          | 77.70         | 426.03     |
| 108 (rs6216320)     | 7          | 69.01         | 280.63     |
| 118 (gnf08_109_993) | 8          | 53.04         | 360.41     |
| 123 (rs6207781)     | 9          | 20.74         | 1242.01    |
| 137 (rs13480657)    | 10         | 39.72         | 379.31     |
| 145 (rs3023251)     | 11         | 13.71         | 241.39     |
| 156 (rs13481230)    | 11         | 75.02         | 256.88     |
| 165 (rs13481509)    | 12         | 26.44         | 194.32     |
| 202 (rs6326790)     | 15         | 45.98         | 346.22     |
| 205 (rs4180773)     | 16         | 29.53         | 175.19     |
| 217 (rs4231494)     | 17         | 19.56         | 183.36     |
| 224 (rs6358426)     | 18         | 10.10         | 375.13     |
