# Supplementary material
Source: PubMed Central journal article supplement (PMC3730925)
Supplement: ff5d3c392aad414c21bc164994c24f76_genetics.113.152736-13.pdf [file ff5d3c392aad414c21bc164994c24f76_genetics.113.152736-13.pdf]

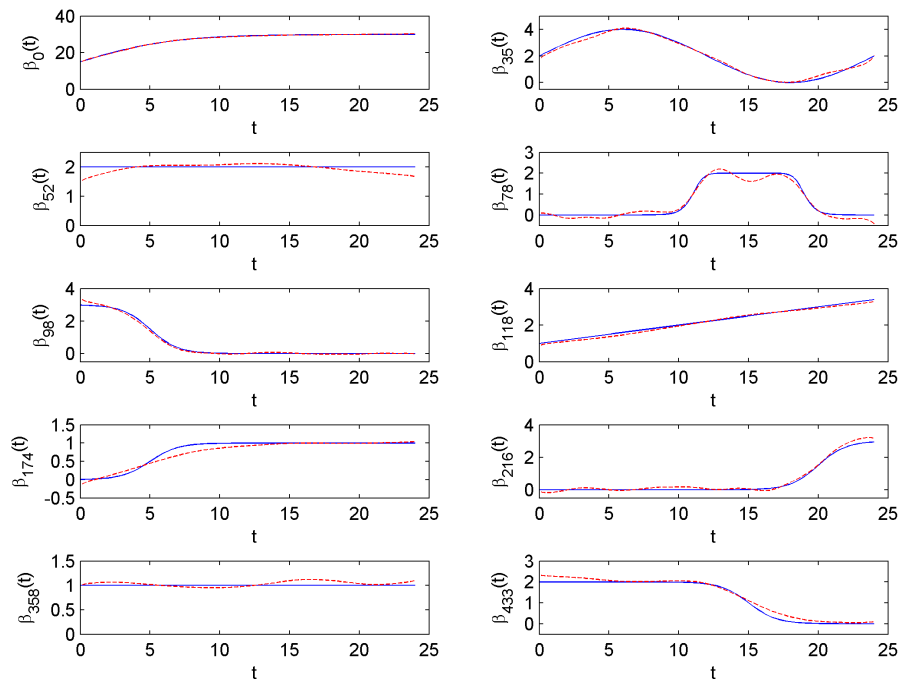

(a) Estimates of **VBfun** which assumed the diagonal residual covariance structure

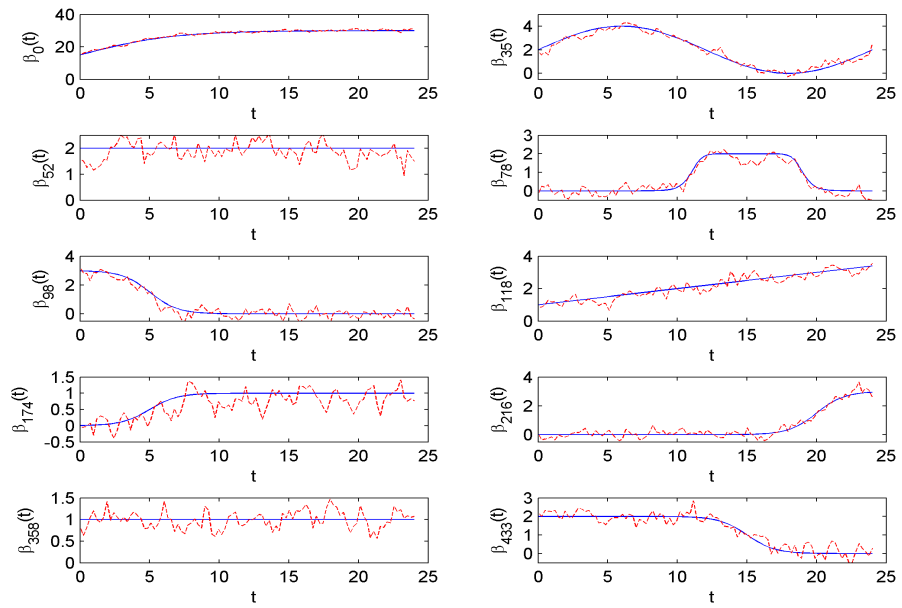

(b) Estimates of **VBnonfun** which assumed the diagonal residual covariance structure

**Figure S9** Simulated data with  $k = 100$ ,  $u = 0:5$ : the estimated trend curves (red dashed lines) against the simulated trend curves (blue solid lines)
